# Supplementary material for: Decline in AmpC β-lactamase-producing Escherichia coli in a Dutch teaching hospital (2013-2016)
Source: PubMed Central journal article supplement (PMC6166941; doi:10.1371/journal.pone.0204864), 2018-10-01
Supplement: pone.0204864.s001.pdf [file pone.0204864.s001.pdf]

| Strain             | Acquired β-lactamase | Mulvey type <sup>‡</sup> | -118 | -88 | -82 | -73 | -42 | -32 | -28 | -18 | -16 | -15 | -13 | -11 | -1 | 6 | 17 | 22 | 24 | 31 | 33 | 34 | 35 | 37 | 58 | 63 | 70 | 81                 | cAmpC                        | MIC cftx (mg/L) | E-test MIC cftx (mg/L) | MIC cftz (mg/L) |    |
|--------------------|----------------------|--------------------------|------|-----|-----|-----|-----|-----|-----|-----|-----|-----|-----|-----|----|---|----|----|----|----|----|----|----|----|----|----|----|--------------------|------------------------------|-----------------|------------------------|-----------------|----|
| <i>E. coli</i> K12 |                      |                          | T    | C   | A   | C   | C   | T   | G   | G   | -   | -   | -   | C   | C  | C | C  | C  | C  | C  | G  | G  | C  | G  | C  | T  | C  | G                  | Hyperproduction <sup>†</sup> |                 |                        |                 |    |
| AmpC2013-A*        | none                 | 23                       |      |     |     | T   |     | A   |     |     |     |     |     |     |    |   |    |    |    |    |    |    |    |    |    |    | A  | Yes (19-fold)      | 32                           | 0,75            | 1,5                    |                 |    |
| AmpC2013-B         | none                 | n/a                      |      |     |     |     |     |     |     |     |     |     |     |     |    |   |    |    |    |    |    |    |    |    |    |    |    | n/a                | 24                           | 0,75            | 1,5                    |                 |    |
| AmpC2013-C*        | none                 | 8                        |      |     |     | T   |     |     |     |     |     |     | T   |     | T  |   |    |    |    | A  |    |    |    |    |    |    | A  | Yes (24-fold)      | 128                          | 3               | 2                      |                 |    |
| AmpC2013-D         | none                 | 3                        |      | T   | G   |     | T   |     |     | A   |     |     |     |     |    |   |    |    |    |    |    |    |    |    | T  |    |    | Yes (22-fold)      | 32                           | 1,5             | 3                      |                 |    |
| AmpC2013-E         | none                 | unknown                  |      |     |     | T   |     |     |     |     |     | G   |     |     |    |   |    |    |    |    |    |    |    |    | T  | C  | A  | Yes (16-fold)      | 48                           | 1               | 1,5                    |                 |    |
| AmpC2013-F         | none                 | unknown                  |      |     |     | T   |     |     |     |     |     | G   |     |     |    |   |    |    |    |    |    |    |    |    | T  | C  | A  | Yes (16-fold)      | 32                           | 1               | 1,5                    |                 |    |
| AmpC2013-G*        | none                 | 3                        |      | T   | G   |     | T   |     |     | A   |     |     |     |     |    |   |    |    |    |    |    |    |    |    |    |    |    | Yes (22-fold)      | 96                           | 3               | 6                      |                 |    |
| AmpC2013-H         | none                 | unknown                  |      | T   | G   |     | T   |     |     | A   |     |     |     |     |    |   | A  |    |    |    |    |    |    |    |    |    |    | Yes (=60-140-fold) | 96                           | 4               | 4                      |                 |    |
| AmpC2013-I*        | TEM wt               | 3                        |      | T   | G   |     | T   |     |     | A   |     |     |     |     |    |   |    |    |    |    |    |    |    |    |    |    |    | Yes (22-fold)      | 32                           | 12              | 32                     |                 |    |
| AmpC2013-J         | none                 | 3                        |      | T   | G   |     | T   |     |     | A   |     |     |     |     |    |   |    |    |    |    |    |    |    |    |    |    |    | Yes (22-fold)      | 24                           | 1,5             | 2                      |                 |    |
| AmpC2013-K*        | TEM wt               | unknown                  | A    |     |     | T   |     |     |     |     |     | G   |     |     |    |   |    |    |    |    |    |    |    |    |    |    | A  | Yes (16-fold)      | 64                           | 1,5             | 2                      |                 |    |
| AmpC2013-L*        | none                 | 2                        |      |     |     | T   |     | A   |     |     |     |     |     |     |    |   |    |    |    |    |    |    |    |    | T  | C  | A  | Yes (10-fold)      | 24                           | 0,75            | 1                      |                 |    |
| AmpC2013-M         | CMY-2                | 11                       |      |     |     |     |     |     |     |     |     |     |     |     |    |   |    |    |    |    |    |    |    |    |    |    | T  |                    | No                           | ≥256            | 16                     | 24              |    |
| AmpC2013-N         | CMY-2                | 12                       |      |     |     | T   |     |     |     |     |     |     |     |     |    |   |    |    |    |    |    |    |    |    | T  | C  | A  | No                 | 48                           | 6               | 6                      |                 |    |
| AmpC2013-O*        | CMY-2 + TEM wt       | 12                       |      |     |     | T   |     |     |     |     |     |     |     |     |    |   |    |    |    |    |    |    |    |    | T  | C  | A  | No                 | 96                           | 8               | 12                     |                 |    |
| AmpC2013-P*        | CMY-2 + TEM wt       | 12                       |      |     |     | T   |     |     |     |     |     |     |     |     |    |   |    |    |    |    |    |    |    |    | T  | C  | A  | No                 | 96                           | 8               | 12                     |                 |    |
| AmpC2013-Q         | CMY-2                | 11                       |      |     |     |     |     |     |     |     |     |     |     |     |    |   |    |    |    |    |    |    |    |    |    |    | T  |                    | No                           | 96              | 6                      | 6               |    |
| AmpC2013-R         | CMY-2 + TEM wt       | 7                        |      |     |     | T   |     |     | A   |     |     |     |     |     |    |   | T  |    |    |    |    |    |    |    |    |    |    | A                  | No                           | 192             | 12                     | 32              |    |
| AmpC2013-S*        | CMY-2                | unknown                  | A    |     |     | T   |     |     |     |     |     |     |     |     |    |   |    |    |    |    |    |    |    |    |    |    |    | A                  | No                           | 96              | 8                      | 16              |    |
| AmpC2014-A         | none                 | unknown                  |      |     |     | T   |     | A   | A   |     |     |     |     |     |    |   |    |    |    |    |    |    |    |    |    |    |    | A                  | Yes (8-fold)                 | 24              | 0,75                   | 1               |    |
| AmpC2014-B         | none                 | unknown                  |      |     |     | T   |     | A   |     |     |     |     |     |     |    |   |    |    |    |    |    |    |    |    | T  | C  |    | Yes (8-fold)       | 16                           | 0,75            | 1                      |                 |    |
| AmpC2014-C         | none                 | unknown                  |      |     |     |     |     |     |     |     |     |     |     | T   |    |   |    |    |    |    |    |    |    |    |    |    | T  | Yes (≈21-68 fold)  | 48                           | 1,5             | 1,5                    |                 |    |
| AmpC2014-D         | none                 | 3                        |      | T   | G   |     | T   |     |     | A   |     |     |     |     |    |   |    |    |    |    |    |    |    |    |    | T  |    | Yes (22-fold)      | 12                           | 1,5             | 2                      |                 |    |
| AmpC2014-E*        | none                 | 3                        |      | T   | G   |     | T   |     |     | A   |     |     |     |     |    |   |    |    |    |    |    |    |    |    |    | T  |    | Yes (22-fold)      | 12                           | 0,75            | 2                      |                 |    |
| AmpC2014-F*        | none                 | 3                        |      | T   | G   |     | T   |     |     | A   |     |     |     |     |    |   |    |    |    |    |    |    |    |    |    | T  |    | Yes (22-fold)      | 12                           | 0,5             | 2                      |                 |    |
| AmpC2014-G*        | none                 | 3                        |      | T   | G   |     | T   |     |     | A   |     |     |     |     |    |   |    |    |    |    |    |    |    |    |    | T  |    | Yes (22-fold)      | 16                           | 2               | 2                      |                 |    |
| AmpC2014-H         | none                 | 3                        |      | T   | G   |     | T   |     |     | A   |     |     |     |     |    |   |    |    |    |    |    |    |    |    |    | T  |    | Yes (22-fold)      | 48                           | 3               | 4                      |                 |    |
| AmpC2014-I         | none                 | unknown                  |      |     |     |     |     |     |     |     |     | C   |     |     |    |   |    |    |    |    |    |    |    |    |    |    | T  | Yes (≈16-64 fold)  | 64                           | 2               | 3                      |                 |    |
| AmpC2014-J         | none                 | 8                        |      |     |     | T   |     |     |     |     |     |     | T   |     |    |   |    |    |    |    |    |    |    |    |    |    |    | A                  | Yes (24-fold)                | 24              | 0,75                   | 1               |    |
| AmpC2014-K         | CMY-2 + TEM wt       | 11                       |      |     |     |     |     |     |     |     |     |     |     |     |    |   |    |    |    |    |    |    |    |    |    |    | T  |                    | No                           | 24              | 32                     | 32              |    |
| AmpC2014-L         | CMY-2                | 11                       | A    |     |     | T   |     |     | A   |     |     |     |     |     |    |   |    |    |    |    |    |    |    |    |    |    |    | A                  | No                           | 96              | 12                     | 24              |    |
| AmpC2014-M         | CMY-2                | 11                       |      |     |     |     |     |     |     |     |     |     |     |     |    |   |    |    |    |    |    |    |    |    |    |    | T  |                    | No                           | ≥256            | 32                     | 48              |    |
| AmpC2014-N         | CMY-2+CTX-M-1-15     | wildtype                 |      |     |     |     |     |     |     |     |     |     |     |     |    |   |    |    |    |    |    |    |    |    |    |    |    |                    |                              | No              | 192                    | ≥32             | 48 |
| AmpC2014-O*        | CMY-2                | 52                       |      |     |     |     |     |     |     |     |     |     |     |     |    |   |    |    |    |    |    |    |    |    |    |    | T  |                    | No                           | 128             | 8                      | 24              |    |
| AmpC2014-P*        | CMY-2                | 11                       |      |     |     |     |     |     |     |     |     |     |     |     |    |   |    |    |    |    |    |    |    |    |    |    | T  |                    | No                           | ≥256            | ≥32                    | 48              |    |
| AmpC2015-A         | neg                  | unknown                  |      |     |     | T   |     |     |     |     |     | G   |     |     |    |   |    |    |    |    |    |    |    |    |    |    |    | A                  | Yes (16-fold)                | 32              | 1                      | 2               |    |
| AmpC2015-B         | neg                  | unknown                  |      |     |     | T   |     |     |     |     |     |     | T   |     |    |   |    |    |    |    |    |    |    |    |    | T  | C  | A                  | Yes (24-fold)                | 32              | 1                      | 1               |    |
| AmpC2015-C         | neg                  | 3                        |      | T   | G   |     | T   |     |     | A   |     |     |     |     |    |   |    |    |    |    |    |    |    |    |    | T  |    |                    | Yes (22-fold)                | 64              | 1,5                    | 3               |    |
| AmpC2015-D         | neg                  | 3                        |      | T   | G   |     | T   |     |     | A   |     |     |     |     |    |   |    |    |    |    |    |    |    |    |    | T  |    |                    | Yes (22-fold)                | 32              | 2                      | 4               |    |
| AmpC2015-E         | neg                  | 3                        |      | T   | G   |     | T   |     |     | A   |     |     |     |     |    |   |    |    |    |    |    |    |    |    |    | T  |    |                    | Yes (22-fold)                | 16              | ≥32                    | 8               |    |
| AmpC2015-F         | CMY-2                | WT                       |      |     |     |     |     |     |     |     |     |     |     |     |    |   |    |    |    |    |    |    |    |    |    |    |    |                    | No                           | 128             | 8                      | 24              |    |
| AmpC2015-G         | CMY-2                | WT                       |      |     |     |     |     |     |     |     |     |     |     |     |    |   |    |    |    |    |    |    |    |    |    |    |    |                    |                              |                 |                        |                 |    |
| AmpC2015-H         | neg                  | 3                        |      | T   | G   |     | T   |     |     | A   |     |     |     |     |    |   |    |    |    |    |    |    |    |    |    | T  |    |                    | Yes (22-fold)                | ≥256            | 4                      | 6               |    |
| AmpC2015-I         | neg                  | 23                       |      |     |     | T   |     | A   |     |     |     |     |     |     |    |   |    |    |    |    |    |    |    |    |    |    |    |                    | Yes (19-fold)                | 48              | 2                      | 2               |    |
| AmpC2016-A         | CMY-2                | 12                       |      |     |     | T   |     |     |     |     |     |     |     |     |    |   |    |    |    |    |    |    |    |    |    | T  | C  | A                  | No                           | ≥256            | ≥32                    | 128             |    |
| AmpC2016-B         | CMY-2 + TEM wt       | 18                       |      | T   | G   |     |     |     |     | A   |     |     |     |     |    |   |    |    |    |    |    |    |    |    |    | T  |    |                    | No                           | ≥256            | ≥32                    | 48              |    |
| AmpC2016-C         | CMY-2 + TEM wt       | 11                       |      |     |     |     |     |     |     |     |     |     |     |     |    |   |    |    |    |    |    |    |    |    |    |    | T  |                    | No                           | ≥256            | ≥32                    | 48              |    |
| AmpC2016-D         | DHA                  | unknown                  |      |     |     | T   |     |     |     |     |     |     |     |     |    |   |    |    |    |    |    |    |    |    |    |    | T  |                    | No                           | 256             | 24                     | 24              |    |
| AmpC2016-E         | neg                  | unknown                  |      |     |     |     |     |     |     |     |     | G   |     |     |    |   |    |    |    |    |    |    |    |    |    |    |    | A                  | Yes (16-fold)                | 24              | 1                      | 16              |    |
| AmpC2016-F         | neg                  | 3                        |      | T   | G   |     | T   |     |     | A   |     |     |     |     |    |   |    |    |    |    |    |    |    |    |    | T  |    |                    | Yes (22-fold)                | 24              | 0,75                   | 1               |    |

↓ -35 box      ↓ -10 box      attenuator

Position number as described by Mulvey et al.<sup>17</sup>. Positions -42 and -18 are involved in de displaced promoter box, positions -32 and -11 are the wild type promoter boxes. Positions -16, -15 and -13 contain insertions in the spacer region of the promoter. The attenuator region is located between position 17 and position 37.

\*Amplification Fragment Length Polymorphism (AFLP) technique performed by the VU Amsterdam

‡ As defined by Mulvey et al. (2005). The reader should refer to Table 3 of the given reference to see a complete characterization of each promoter type.

† Delta-delta cycle threshold, interpreted as fold-expression as defined by Tracz et al. (2007<sup>16</sup>)
